# Supplementary material for: Photochromism and photomagnetism in three cyano-bridged 3d–4f heterobimetallic viologen frameworks
Source: Royal Society of Chemistry journal article supplement (doi:10.1039/d0dt04358c), 2021-01-01
Supplement: d0dt04358c1.pdf [file d0dt04358c1.pdf]

Supporting Information for

## Photochromism and photomagnetism in three cyano-bridged 3d-4f heterobimetallic viologen frameworks

Meng-Hua Li<sup>†</sup>, Ming-Hua You<sup>†, ‡</sup> and Mei-Jin Lin<sup>†, §, ⊥\*</sup>

*<sup>†</sup>Key Laboratory of Molecule Synthesis and Function Discovery, and State Key Laboratory of Photocatalysis on Energy and Environment, College of Chemistry, Fuzhou University, China, 350116. E-mail: meijin\_lin@fzu.edu.cn.*

*<sup>‡</sup>College of Zhicheng, Fuzhou University, China, 350002*

*<sup>§</sup>College of Materials Science and Engineering, Fuzhou University, China, 350116*

*<sup>⊥</sup>Fujian Provincial Key Laboratory of Electrochemical Energy Storage Materials, Fuzhou University, Fuzhou, Fujian, 350002, China*

### Table of Contents:

|                                          |    |
|------------------------------------------|----|
| 1. The additional crystal figure         | S2 |
| 2. Crystal data and structure refinement | S3 |
| 3. Thermo-gravimetric analysis (TG)      | S4 |
| 4. X-ray powder diffraction analysis     | S5 |
| 5. Luminescence decays                   | S6 |

1. The additional crystal figure for the compound.

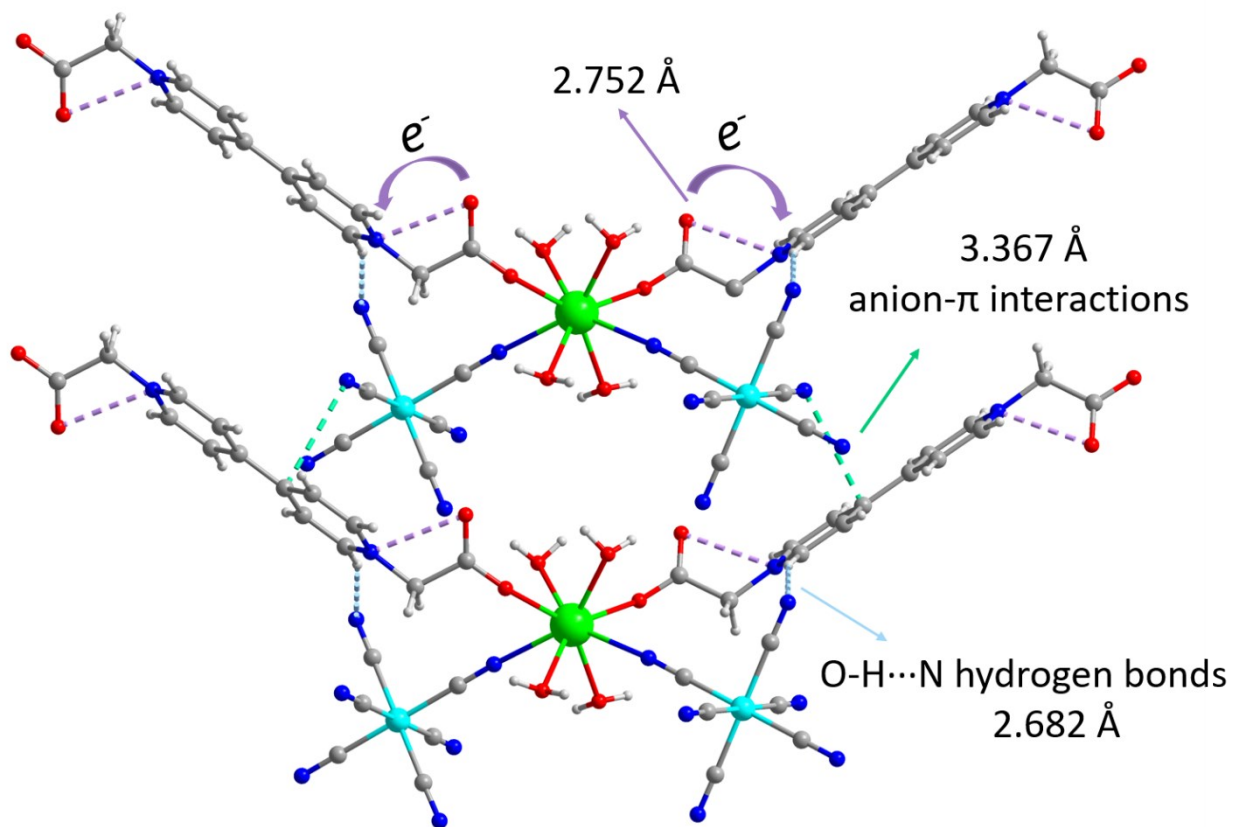

**Fig. S1.** The weak intermolecular O-H...N hydrogen bonds interactions and anion- $\pi$  interactions electron transfer orientation diagrams between  $[\text{Co}(\text{CN})_6]^{3-}$  and Bcbpy ligands.

## 2. Crystal data and structure refinement

Crystal data for the hybrids were collected on a Rigaku Saturn 724 CCD diffractometer with Mo K $\alpha$  radiation ( $\lambda = 0.71073 \text{ \AA}$ ) at 295 K and reduction were performed by using the program CrysAlisPro.<sup>1</sup> The structures were solved by the direct method and different Fourier syntheses. All calculations were performed by full-matrix least-squares methods on F<sup>2</sup> by using the SHELXTL program<sup>2</sup>, all non-hydrogen atoms were refined with anisotropic thermal parameters and the hydrogen atoms were fixed at calculated positions and refined by a riding mode. Details of the crystal parameter data collection and refinement for hybrid **CoDy**, **CoEu**, and **FeDy** are summarized in Table 1. Crystallographic data have been deposited with the Cambridge Crystallographic Data Centre as supplementary publication number CCDC 2040867-2040869 and 2061512 for **CoDy**, **CoEu**, **FeDy**, and **CoEu-a (after irradiation)** which can be obtained free of charge from the Cambridge Crystallographic Data Centre via [www.ccdc.cam.ac.uk/data\\_request/cif](http://www.ccdc.cam.ac.uk/data_request/cif).

**Table 1.** Crystallographic Data and Structural Refinements Parameters for **CoDy**, **CoEu**, **FeDy** and **CoEu-a**.

| Complex                                        | <b>CoDy</b>                                                           | <b>CoEu</b>                                                            | <b>FeDy</b>                                                              | <b>CoEu-a</b>                                                         |
|------------------------------------------------|-----------------------------------------------------------------------|------------------------------------------------------------------------|--------------------------------------------------------------------------|-----------------------------------------------------------------------|
| Empirical formula                              | <b>C<sub>20</sub>H<sub>33.06</sub>CoDyN<sub>8</sub>O<sub>13</sub></b> | <b>C<sub>21.4</sub>H<sub>36.2</sub>CoEuN<sub>8</sub>O<sub>13</sub></b> | <b>C<sub>21.04</sub>H<sub>32.66</sub>DyFeN<sub>8</sub>O<sub>13</sub></b> | <b>C<sub>21</sub>H<sub>29.57</sub>CoEuN<sub>8</sub>O<sub>12</sub></b> |
| Formula weight                                 | 815.03                                                                | 824.47                                                                 | 824.04                                                                   | 796.98                                                                |
| Temperature/K                                  | 293(2)                                                                | 293(2)                                                                 | 285(5)                                                                   | 293(2)                                                                |
| Crystal system                                 | monoclinic                                                            | monoclinic                                                             | monoclinic                                                               | monoclinic                                                            |
| Space group                                    | <i>C</i> 2/ <i>c</i>                                                  | <i>C</i> 2/ <i>c</i>                                                   | <i>C</i> 2/ <i>c</i>                                                     | <i>C</i> 2/ <i>c</i>                                                  |
| a/ $\text{\AA}$                                | 19.882(3)                                                             | 19.8318(8)                                                             | 19.7891(9)                                                               | 19.8265(12)                                                           |
| b/ $\text{\AA}$                                | 8.0889(7)                                                             | 8.1069(2)                                                              | 8.1030(3)                                                                | 8.1126(4)                                                             |
| c/ $\text{\AA}$                                | 20.090(2)                                                             | 20.1876(7)                                                             | 20.1878(9)                                                               | 20.1853(9)                                                            |
| $\alpha$ / $^\circ$                            | 90                                                                    | 90                                                                     | 90                                                                       | 90                                                                    |
| $\beta$ / $^\circ$                             | 108.912(14)                                                           | 108.793(4)                                                             | 108.704(5)                                                               | 108.862(6)                                                            |
| $\gamma$ / $^\circ$                            | 90                                                                    | 90                                                                     | 90                                                                       | 90                                                                    |
| Volume/ $\text{\AA}^3$                         | 3056.5(7)                                                             | 3072.62(19)                                                            | 3066.2(2)                                                                | 3072.3(3)                                                             |
| Z                                              | 4                                                                     | 4                                                                      | 4                                                                        | 4                                                                     |
| $\rho_{\text{calc}}/\text{cm}^3$               | 1.771                                                                 | 1.782                                                                  | 1.785                                                                    | 1.723                                                                 |
| $\mu/\text{mm}^{-1}$                           | 3.041                                                                 | 2.637                                                                  | 2.965                                                                    | 2.632                                                                 |
| 2 $\theta$ range for data collection/ $^\circ$ | 4.286 to 58.944                                                       | 4.262 to 58.584                                                        | 5.478 to 59.098                                                          | 4.264 to 50.05                                                        |
| Reflections collected                          | 11720                                                                 | 13625                                                                  | 13783                                                                    | 12033                                                                 |
| R <sub>int</sub>                               | 0.0915                                                                | 0.0346                                                                 | 0.0261                                                                   | 0.2015                                                                |
| Data/restraints/parameters                     | 2705/0/188                                                            | 3568/522/289                                                           | 3552/165/304                                                             | 2715/165/279                                                          |
| Goodness-of-fit on F <sup>2</sup>              | 0.976                                                                 | 1.163                                                                  | 1.074                                                                    | 1.088                                                                 |
| Final R indexes [ $I \geq 2\sigma(I)$ ]        | R <sub>1</sub> = 0.0555                                               | R <sub>1</sub> = 0.0310                                                | R <sub>1</sub> = 0.0230                                                  | R <sub>1</sub> = 0.0562                                               |
| Final R indexes [all data]                     | R <sub>1</sub> = 0.1035                                               | R <sub>1</sub> = 0.0379                                                | R <sub>1</sub> = 0.0266                                                  | R <sub>1</sub> = 0.0729                                               |
| Largest diff. peak/hole / e $\text{\AA}^{-3}$  | 1.10/-1.49                                                            | 1.15/-0.68                                                             | 0.46/-0.48                                                               | 1.47/-1.16                                                            |

### 3. Thermo-gravimetric analysis (TG)

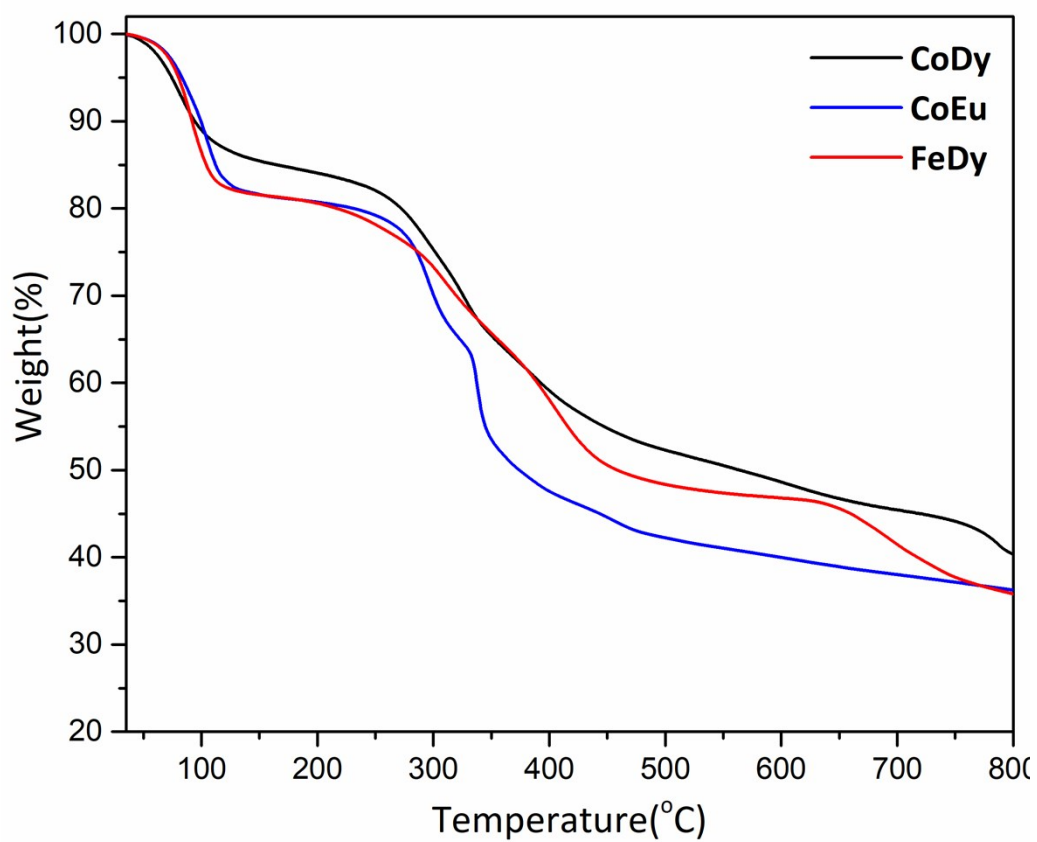

**Figure S2.** The TG curves of **CoDy**, **CoEu**, and **FeDy** under  $N_2$  atmosphere with a heating rate of  $10\text{ }^\circ\text{C}/\text{min}$ .

#### 4. X-ray powder diffraction analysis

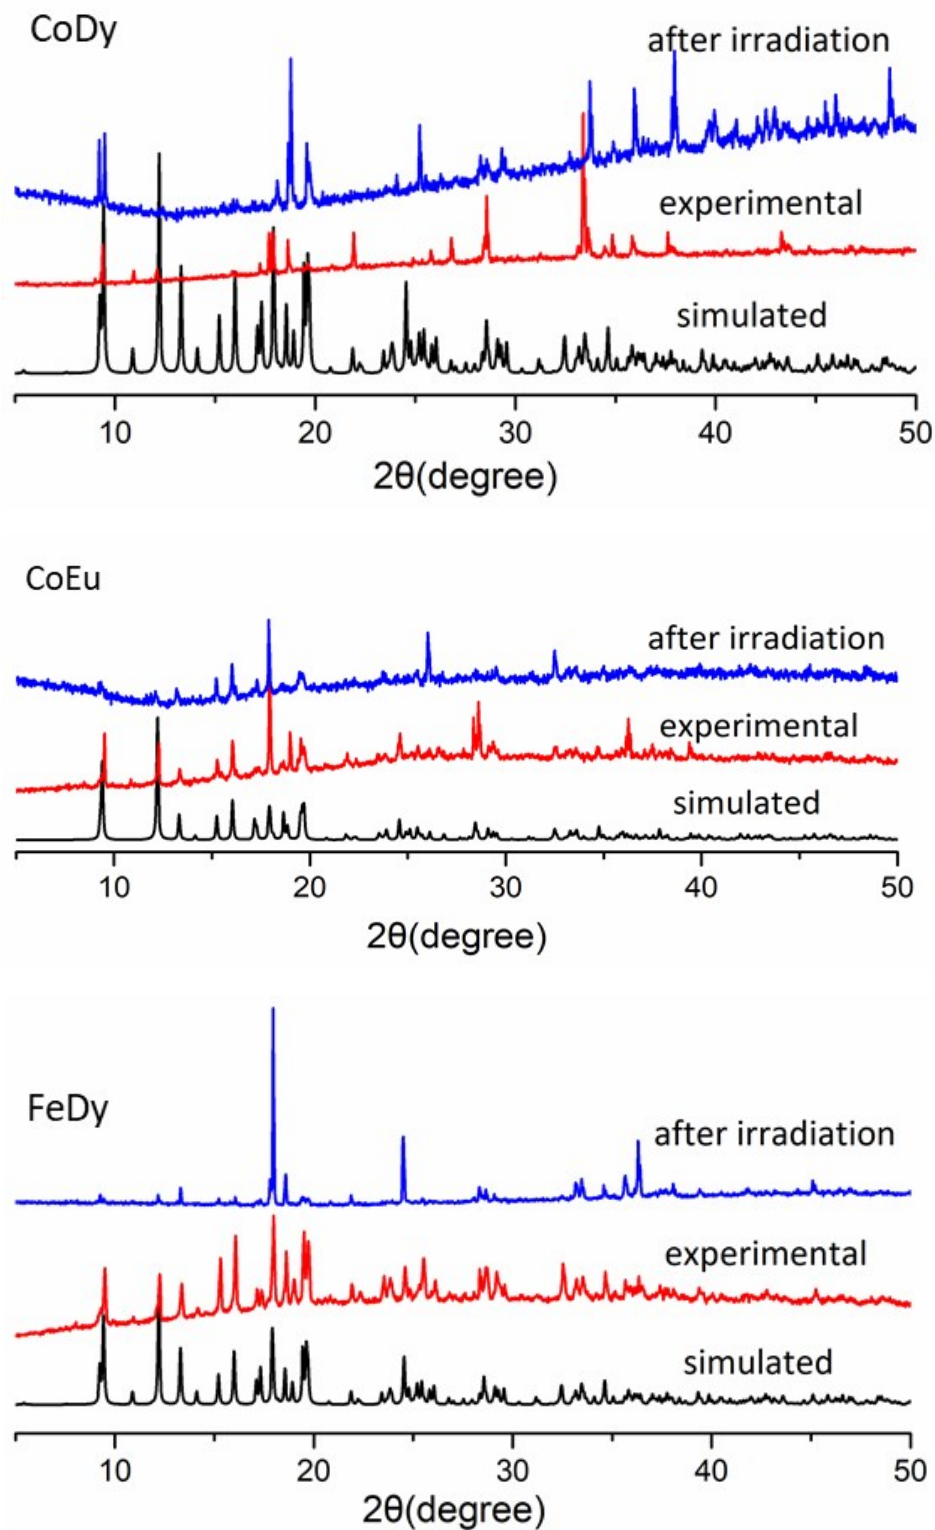

Figure S3. PXRD patterns of CoDy, CoEu, and FeDy after the irradiation for 15 min.

## 5. Mössbauer spectra of FeDy

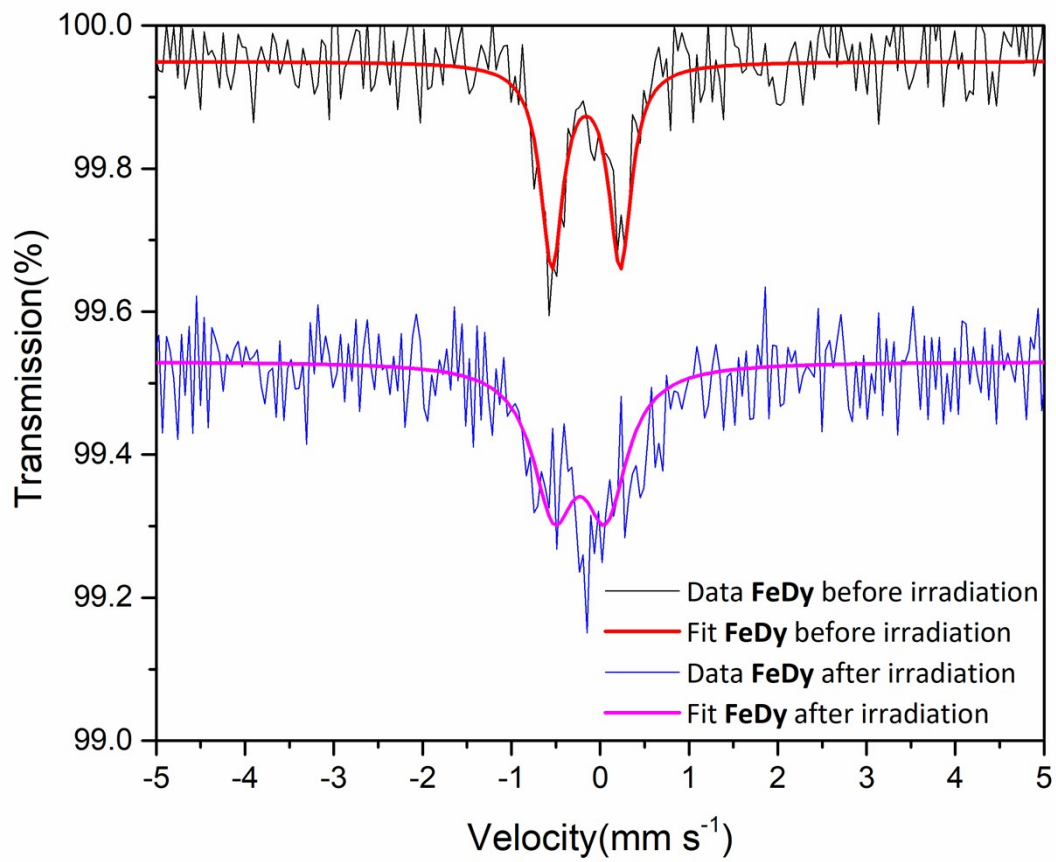

Figure S4. Mössbauer spectra of FeDy before and after irradiation recorded at room temperature.

## 6. Luminescent behaviors of compounds CoEu

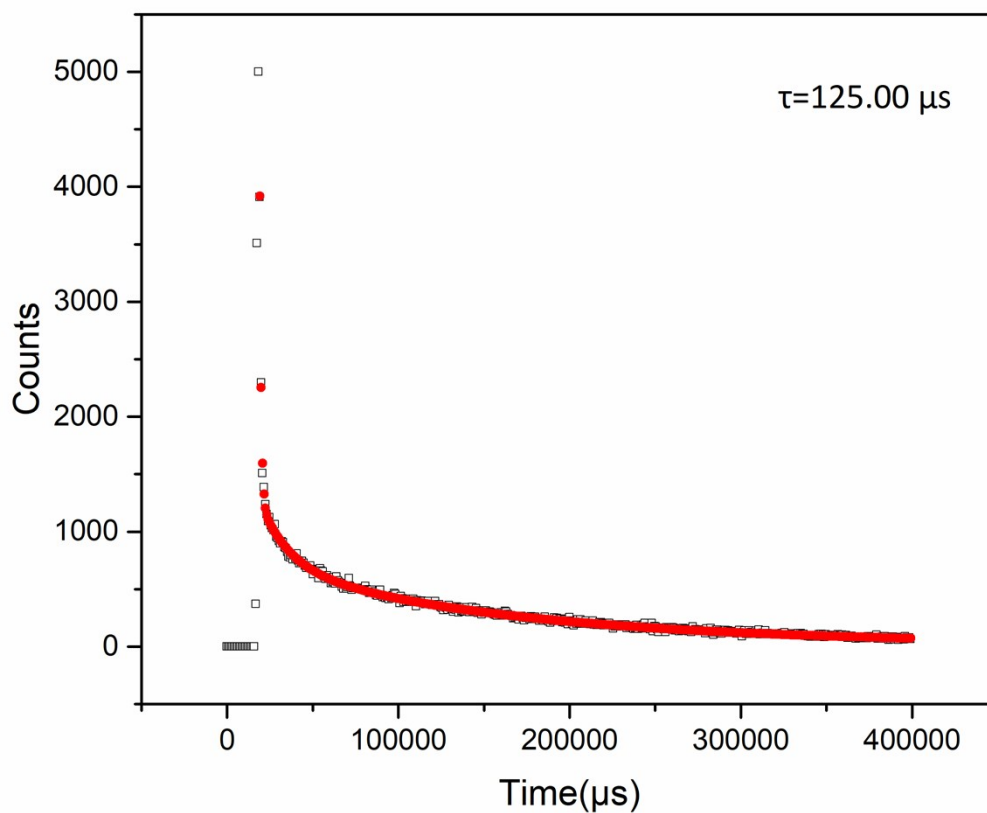

Figure S5. Luminescence decays of compound CoEu under ambient conditions.

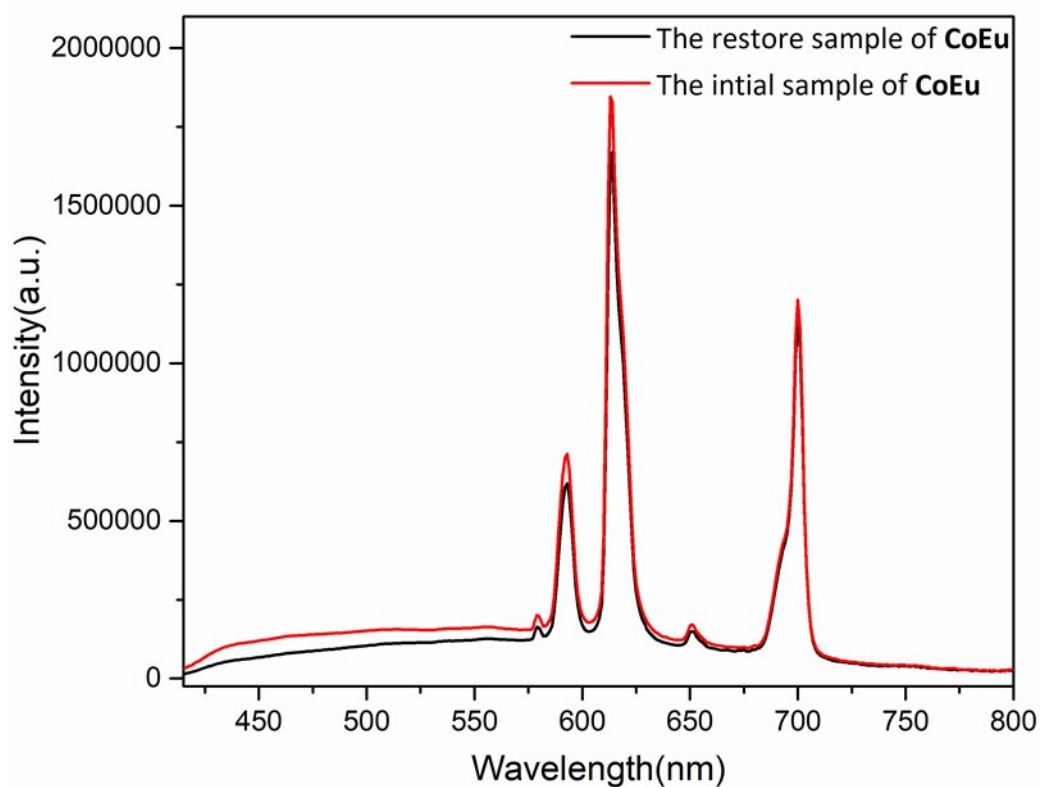

Figure S6. The luminescence emission of the original sample and the restored sample.

## Reference

S1 *CrysAlisPro* 2012, Version 1.171.36.31; Agilent Technologies.

S2 (a) O.V. Dolomanov, L. J. Bourhis, R. J. Gildea, J. A. K. Howard, & H. Puschmann, *J. Appl. Cryst.* 2009, **42**, 339-341.; (b) G. M. Sheldrick, *Acta Cryst. C.* 2015, **71**, 3-8.
